# Supplementary material
Source: PubMed Central journal article supplement (PMC6176710)
Supplement: NIHMS987879-supplement-Supplementary_Materials.pdf [file NIHMS987879-supplement-Supplementary_Materials.pdf]

## Supplementary Materials

Table 3. Adjusted and unadjusted prevalence of consumption of low-calorie [sweeteners](#) in National Health and Nutrition Examination Survey 2009-2010 and 2011-2012 among children and adolescents (2 to <18 years) and adults (≥18 years) by demographic and weight subgroups<sup>a</sup>

| Characteristic                   | Unadjusted Age-adjusted Fully adjusted |                 |              |
|----------------------------------|----------------------------------------|-----------------|--------------|
|                                  | ←%±standard error→                     |                 |              |
| <b>All children</b>              | 25.1±1.1                               | NA <sup>b</sup> | NA           |
| <b>Sex</b>                       |                                        |                 |              |
| Male (ref <sup>c</sup> )         | 23.7±1.3                               | 23.7±1.3        | 24.2±1.4     |
| Female                           | 26.6±1.3                               | 26.7±1.3        | 27.1±1.4     |
| <b>Age, y</b>                    |                                        |                 |              |
| 2-5 (ref)                        | 21.5±1.6                               | NA              | 22.0±1.8     |
| 6-11                             | 27.0±1.8**                             | NA              | 27.9±1.7**   |
| 12-17                            | 25.7±1.6                               | NA              | 25.8±1.8     |
| <b>Socioeconomic status</b>      |                                        |                 |              |
| Low <sup>d</sup> (ref)           | 20.0±1.0                               | 20.1±1.0        | 22.2±1.3     |
| Middle                           | 25.1±1.6**                             | 25.1±1.6**      | 25.6±1.7     |
| High                             | 29.9±1.8***                            | 29.8±1.8***     | 27.9±1.6**   |
| <b>Weight</b>                    |                                        |                 |              |
| Normal weight <sup>e</sup> (ref) | 23.7±1.1                               | 23.8±1.1        | 23.8±1.2     |
| Overweight                       | 25.6±2.3                               | 25.5±2.2        | 26.2±2.5     |
| Obese                            | 31.0±2.1***                            | 30.5±2.1***     | 33.0±2.3***  |
| <b>Race/ethnicity</b>            |                                        |                 |              |
| Non-Hispanic white (ref)         | 30.1±1.8                               | 30.0±1.8        | 30.3±1.7     |
| Non-Hispanic black               | 18.9±1.2***                            | 18.8±1.2***     | 19.4±1.2***  |
| Hispanic                         | 19.7±1.0***                            | 19.8±1.0***     | 20.6±1.1***  |
| <b>All adults</b>                | 41.4±0.8                               | NA              | NA           |
| <b>Sex</b>                       |                                        |                 |              |
| Male (ref)                       | 36.4±0.9                               | 36.6±0.9        | 36.4±0.01    |
| Female                           | 46.2±1.1***                            | 45.9±1.1***     | 47.8±0.01*** |
| <b>Age, y</b>                    |                                        |                 |              |
| 18-34 (ref)                      | 30.1±0.9                               | NA              | 36.9±1.0     |
| 35-54                            | 42.6±1.5***                            | NA              | 43.1±1.5**   |
| 55-74                            | 50.6±1.7***                            | NA              | 45.9±1.7***  |
| ≥75                              | 49.3±1.8***                            | NA              | 45.5±2.2**   |
| <b>Socioeconomic status</b>      |                                        |                 |              |
| Low <sup>d</sup> (ref)           | 28.7±1.0                               | 30.9±1.1        | 31.7±1.1     |

| <b>Characteristic</b>            | <b>Unadjusted</b>       | <b>Age-adjusted</b>     | <b>Fully adjusted</b>   |
|----------------------------------|-------------------------|-------------------------|-------------------------|
| Middle                           | 37.5±1.3 <sup>***</sup> | 37.2±1.2 <sup>***</sup> | 37.5±1.2 <sup>**</sup>  |
| High                             | 49.1±1.1 <sup>***</sup> | 48.3±1.1 <sup>***</sup> | 48.3±1.2 <sup>***</sup> |
| <b>Education</b>                 |                         |                         |                         |
| Less than high school (ref)      | 33.4 ±1.3               | 32.4±1.3                | 36.9±1.5                |
| High school                      | 38.6±1.4 <sup>*</sup>   | 38.3±1.5 <sup>**</sup>  | 39.8±1.4                |
| Some college                     | 41.6±1.2 <sup>***</sup> | 42.5±1.2 <sup>***</sup> | 41.7±1.1 <sup>**</sup>  |
| College graduate                 | 50.1±1.6 <sup>***</sup> | 50.1±1.5 <sup>***</sup> | 48.9±1.3 <sup>***</sup> |
| <b>Weight</b>                    |                         |                         |                         |
| Normal weight <sup>e</sup> (ref) | 33.3±1.3                | 34.9±1.3                | 34.9±1.2                |
| Overweight                       | 41.8±1.3 <sup>***</sup> | 41.2±1.2 <sup>**</sup>  | 42.4±1.1 <sup>***</sup> |
| Obese                            | 49.1±1.5 <sup>***</sup> | 48.3±1.5 <sup>***</sup> | 48.3±1.6 <sup>***</sup> |
| <b>Race/ethnicity</b>            |                         |                         |                         |
| Non-Hispanic white (ref)         | 46.7±0.9                | 45.8±0.9                | 46.0±0.9                |
| Non-Hispanic black               | 28.4±1.0 <sup>***</sup> | 29.3±1.1 <sup>***</sup> | 28.5±1.1 <sup>***</sup> |
| Hispanic                         | 32.1±0.9 <sup>***</sup> | 34.4±0.9 <sup>**</sup>  | 37.4±0.9 <sup>***</sup> |
| <b>Diabetes</b>                  |                         |                         |                         |
| No (ref)                         | 39.0±0.8                | 39.4±0.8                | 40.1±0.9                |
| Yes                              | 67.4±1.8 <sup>***</sup> | 62.7±2.2 <sup>***</sup> | 65.3±2.1 <sup>***</sup> |

aLogistic regression models were used to examine the differences in consumption estimates across subgroups.

bNA=not applicable.

cref=reference.

dDefined based on tertiles of poverty-to-income ratio.

eDefined based on standard body mass index (adults)<sup>19</sup> and body mass index (children) percentile cutoffs.<sup>18</sup>

\* $P < 0.05$ .

\*\* $P < 0.01$ .

\*\*\* $P < 0.001$ .
